# Supplementary material for: Genetic background modifies vulnerability to glaucoma-related phenotypes in Lmx1b mutant mice
Source: PubMed Central journal article supplement (PMC7903917; doi:10.1242/dmm.046953), 2021-02-19
Supplement: dmm-14-046953-s1.pdf [file dmm-14-046953-s1.pdf]

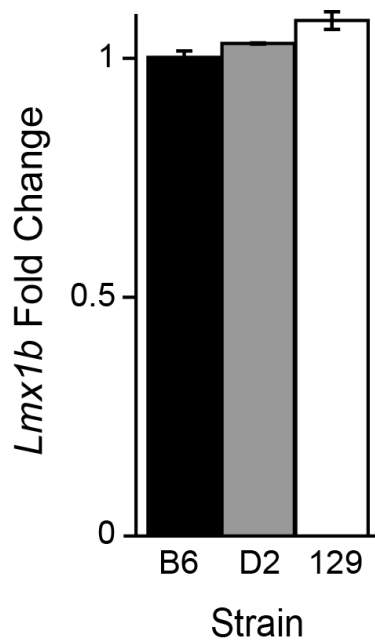

**Figure S1: Ocular *Lmx1b* transcript levels are not different across tested inbred strains.** *Lmx1b* expression in all anterior segment tissues (minus lens). There were no significant differences in *Lmx1b* transcript levels between the susceptible B6 strain and other backgrounds examined [Histogram  $\pm$  S.E.M; fold change relative to B6 shown;  $n = 3$  per group; B6 vs. D2,  $P = 0.641$ ; B6 vs. 129,  $P = 0.093$ ].

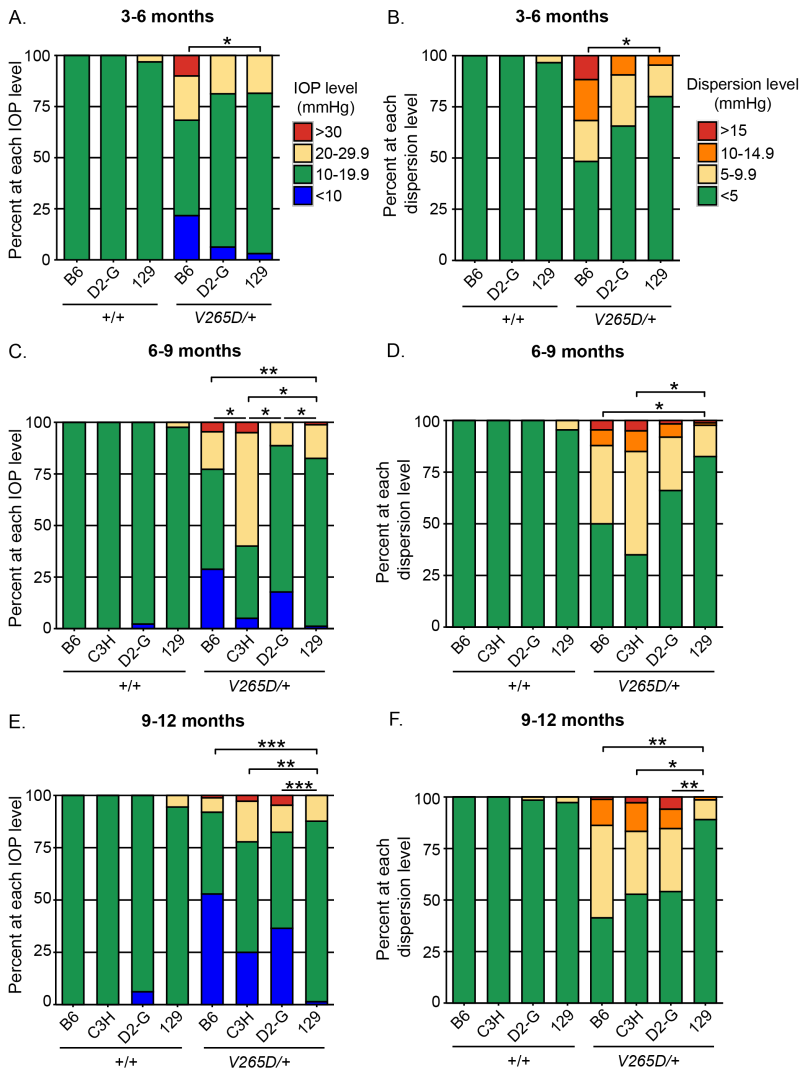

**Figure S2: Frequency distributions of binned IOP values.** The data shown in Figure 4 were binned to help to visualize strain difference. **A,C,E** Binned IOP values. **B,D,F** Binned IOP dispersion values. \*  $P < 0.01$ , \*\*  $P < 1E-05$ , \*\*\*  $P < 1E-10$  (see supplementary table 2 for exact P-values).

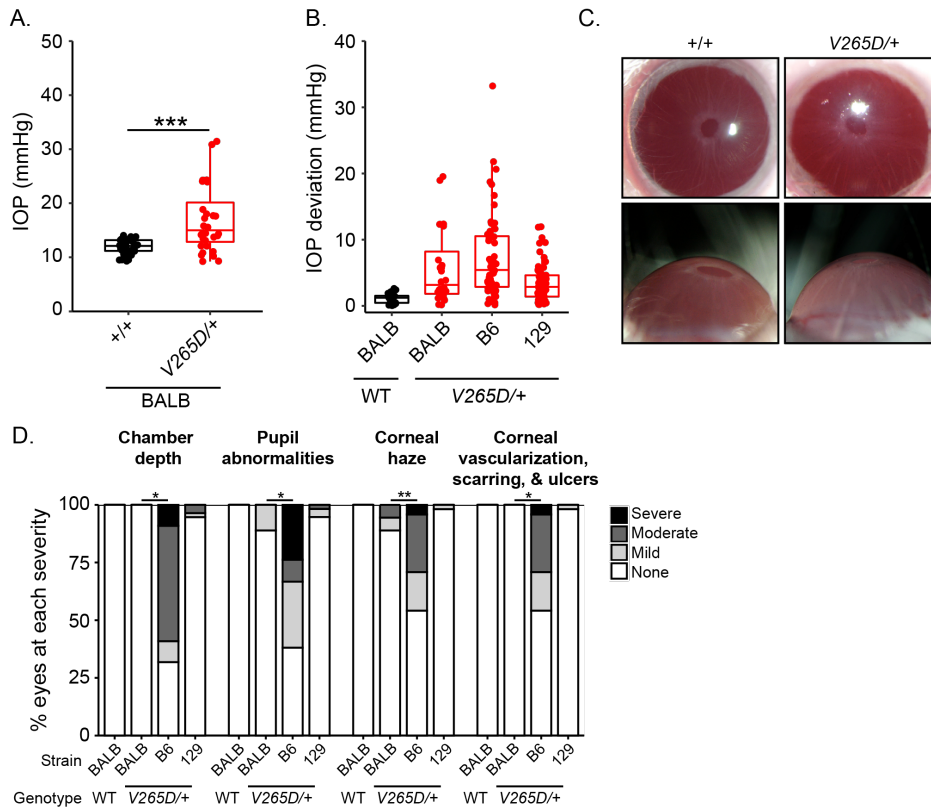

**Figure S3: The tyrosinase deficient BALB background does not exacerbate *Lmx1b* mutant phenotypes. (A and B)** Mutants on the BALB background have elevated IOP compared to WT controls ( $p = 5.4E-05$ ). BALB background does not increase the IOP deviation compared to other pigmented backgrounds (B6 and 129). **(C)** Representative slit-lamp photos of both front and side views from BALB WT and mutant eyes at 3 months of age. **(D)** BALB mutant mice rarely have anterior segment abnormalities and when present they were mild. See supplementary table 2 for P values. All mice were examined between 3 and 6 months of age. At least 16 eyes were examined in each group. \*  $P < 0.01$ ; \*\*  $P < 1.0E-05$ ; \*\*\*  $P < 1.0E-10$  (see supplementary Table 1 for P values).

**Table S1:****A. Anterior chamber deepening *P* values 3-5 months old**

| Group    | B6 WT ( <i>n</i> = 24) | B6 HET ( <i>n</i> = 22) | D2-G HET ( <i>n</i> = 43) | 129 HET ( <i>n</i> = 56) | BALB HET ( <i>n</i> = 18) |
|----------|------------------------|-------------------------|---------------------------|--------------------------|---------------------------|
| B6 WT    | NA                     |                         |                           |                          |                           |
| B6 HET   | 3.33E-07               | NA                      |                           |                          |                           |
| D2-G HET | NA                     | 0.0044                  | NA                        |                          |                           |
| 129 HET  | NA                     | 1.93E-08                | 2.76E-14                  | NA                       |                           |
| BALB HET | NA                     | 1.92E-05                | 1.59E-07                  | NS                       | NA                        |

**6-8 months old**

| Group    | B6 WT ( <i>n</i> = 20) | B6 HET ( <i>n</i> = 43) | C3H HET ( <i>n</i> = 12) | D2-G HET ( <i>n</i> = 48) | 129 HET ( <i>n</i> = 28) |
|----------|------------------------|-------------------------|--------------------------|---------------------------|--------------------------|
| B6 WT    | NA                     |                         |                          |                           |                          |
| B6 HET   | 2.32E-07               | NA                      |                          |                           |                          |
| C3H HET  | NA                     | NS                      | NA                       |                           |                          |
| D2-G HET | NA                     | NS                      | NS                       | NA                        |                          |
| 129 HET  | NA                     | 3.01E-08                | 0.00067                  | 1.51E-10                  | NA                       |

**10-12 months old**

| Group    | B6 WT ( <i>n</i> = 40) | B6 HET ( <i>n</i> = 68) | C3H HET ( <i>n</i> = 42) | D2-G HET ( <i>n</i> = 87) | 129 HET ( <i>n</i> = 31) |
|----------|------------------------|-------------------------|--------------------------|---------------------------|--------------------------|
| B6 WT    | NA                     |                         |                          |                           |                          |
| B6 HET   | 2.11E-16               | NA                      |                          |                           |                          |
| C3H HET  | NA                     | NS                      | NA                       |                           |                          |
| D2-G HET | NA                     | NS                      | NS                       | NA                        |                          |
| 129 HET  | NA                     | 1.08E-11                | 6.14E-18                 | 2.26E-20                  | NA                       |

**B. Pupil abnormalities *P* values****3-5 months old**

| Group    | B6 WT    | B6 HET   | D2-G HET | 129 HET | BALB HET |
|----------|----------|----------|----------|---------|----------|
| B6 WT    | NA       |          |          |         |          |
| B6 HET   | 4.71E-05 | NA       |          |         |          |
| D2-G HET | NA       | NS       | NA       |         |          |
| 129 HET  | NA       | 2.83E-07 | 3.10E-04 | NA      |          |
| BALB HET | NA       | 4.98E-03 | NS       | NS      | NA       |

**6-8 months old**

| Group    | B6 WT    | B6 HET   | C3H HET  | D2-G HET | 129 HET |
|----------|----------|----------|----------|----------|---------|
| B6 WT    | NA       |          |          |          |         |
| B6 HET   | 4.55E-09 | NA       |          |          |         |
| C3H HET  | NA       | NS       | NA       |          |         |
| D2-G HET | NA       | NS       | NS       | NA       |         |
| 129 HET  | NA       | 1.22E-10 | 4.41E-07 | 2.83E-07 | NA      |

**10-12 months old**

| Group    | B6 WT    | B6 HET   | C3H HET  | D2-G HET | 129 HET |
|----------|----------|----------|----------|----------|---------|
| B6 WT    | NA       |          |          |          |         |
| B6 HET   | 3.03E-18 | NA       |          |          |         |
| C3H HET  | NA       | NS       | NA       |          |         |
| D2-G HET | NA       | NS       | NS       | NA       |         |
| 129 HET  | NA       | 5.83E-12 | 7.26E-15 | 8.23E-10 | NA      |

**C. Corneal haze *P* values****3-5 months old**

| Group    | B6 WT    | B6 HET   | D2-G HET | 129 HET | BALB HET |
|----------|----------|----------|----------|---------|----------|
| B6 WT    | NA       |          |          |         |          |
| B6 HET   | 6.20E-14 | NA       |          |         |          |
| D2-G HET | NA       | 2.05E-10 | NA       |         |          |
| 129 HET  | NA       | 6.78E-11 | NS       | NA      |          |
| BALB HET | NA       | 1.27E-09 | 7.61E-03 | NS      | NA       |

**6-8 months old**

| Group    | B6 WT    | B6 HET   | C3H HET | D2-G HET | 129 HET |
|----------|----------|----------|---------|----------|---------|
| B6 WT    | NA       |          |         |          |         |
| B6 HET   | 4.82E-15 | NA       |         |          |         |
| C3H HET  | NA       | 1.59E-05 | NA      |          |         |
| D2-G HET | NA       | 1.97E-08 | NS      | NA       |         |
| 129 HET  | NA       | 2.42E-09 | NS      | NS       | NA      |

**10-12 months old**

| Group    | B6 WT    | B6 HET   | C3H HET | D2-G HET | 129 HET |
|----------|----------|----------|---------|----------|---------|
| B6 WT    | NA       |          |         |          |         |
| B6 HET   | 2.69E-19 | NA       |         |          |         |
| C3H HET  | NA       | NS       | NA      |          |         |
| D2-G HET | NA       | 3.80E-06 | 0.00121 | NA       |         |
| 129 HET  | NA       | 1.13E-06 | 0.00393 | NS       | NA      |

**D. Corneal vascularization, scarring, and ulcers *P* values****3-5 months old**

| Group    | B6 WT    | B6 HET   | D2-G HET | 129 HET | BALB HET |
|----------|----------|----------|----------|---------|----------|
| B6 WT    | NA       |          |          |         |          |
| B6 HET   | 2.21E-04 | NA       |          |         |          |
| D2-G HET | NA       | NS       | NA       |         |          |
| 129 HET  | NA       | 1.61E-06 | 2.96E-05 | NA      |          |
| BALB HET | NA       | 3.49E-03 | 7.41E-03 | NS      | NA       |

**6-8 months old**

| Group    | B6 WT    | B6 HET   | C3H HET  | D2-G HET | 129 HET |
|----------|----------|----------|----------|----------|---------|
| B6 WT    | NA       |          |          |          |         |
| B6 HET   | 4.05E-07 | NA       |          |          |         |
| C3H HET  | NA       | NS       | NA       |          |         |
| D2-G HET | NA       | NS       | NS       | NA       |         |
| 129 HET  | NA       | 9.72E-08 | 4.19E-06 | 1.15E-04 | NA      |

**10-12 months old**

| Group    | B6 WT    | B6 HET   | C3H HET  | D2-G HET | 129 HET |
|----------|----------|----------|----------|----------|---------|
| B6 WT    | NA       |          |          |          |         |
| B6 HET   | 1.55E-12 | NA       |          |          |         |
| C3H HET  | NA       | NS       | NA       |          |         |
| D2-G HET | NA       | NS       | NS       | NA       |         |
| 129 HET  | NA       | 7.25E-11 | 1.49E-15 | 3.71E-16 | NA      |

NA, Not applicable (to test); NS, not significant

**Table S2:**

**A. IOP (Figure 4A-C) 3-6 months old**

| Strain Background | WT sample size | Mutant sample size | P value (WT vs mutant) |
|-------------------|----------------|--------------------|------------------------|
| B6                | 55             | 60                 | NS                     |
| D2-G              | 32             | 32                 | 2.20E-04               |
| Strain 129        | 32             | 65                 | 1.80E-05               |
| BALB              | 36             | 32                 | 5.44E-05               |

**6-9 months old**

| Strain Background | WT sample size | Mutant sample size | P value (WT vs mutant) |
|-------------------|----------------|--------------------|------------------------|
| B6                | 62             | 66                 | NS                     |
| C3H               | 13             | 20                 | 0.0032                 |
| D2-G              | 45             | 62                 | 0.0097                 |
| Strain 129        | 44             | 86                 | 2.80E-04               |

**10-12 months old**

| Strain Background | WT sample size | Mutant sample size | P value (WT vs mutant) |
|-------------------|----------------|--------------------|------------------------|
| B6                | 61             | 87                 | 8.20E-07               |
| C3H               | 25             | 36                 | NS                     |
| D2-G              | 65             | 85                 | NS                     |
| Strain 129        | 37             | 73                 | NS                     |

**B. IOP deviation (Figure 4D-F) 3-6 months old P values**

| Group    | B6 WT    | D2-G WT  | 129 WT   | BALB WT  | B6 HET   | D2-G HET | 129 HET | BALB HET |
|----------|----------|----------|----------|----------|----------|----------|---------|----------|
| B6 WT    | NA       |          |          |          |          |          |         |          |
| D2-G WT  | NS       | NA       |          |          |          |          |         |          |
| 129 WT   | NS       | NS       | NA       |          |          |          |         |          |
| BALB WT  | NS       | NS       | NS       | NA       |          |          |         |          |
| B6 HET   | 3.50E-09 | NA       | NA       | NA       | NA       |          |         |          |
| D2-G HET | NA       | 3.10E-05 | NA       | NA       | 0.0068   | NA       |         |          |
| 129 HET  | NA       | NA       | 5.50E-06 | NA       | 4.50E-05 | NS       | NA      |          |
| BALB HET | NA       | NA       | NA       | 4.16E-05 | NS       | NS       | NS      | NA       |

**6-9 months old P values**

| Group    | B6 WT    | C3H WT | D2-G WT  | 129 WT | B6 HET   | C3H HET | D2-G HET | 129 HET |
|----------|----------|--------|----------|--------|----------|---------|----------|---------|
| B6 WT    | NA       |        |          |        |          |         |          |         |
| C3H WT   | NS       | NA     |          |        |          |         |          |         |
| D2-G WT  | NS       | NS     | NA       |        |          |         |          |         |
| 129 WT   | NS       | NS     | NS       | NA     |          |         |          |         |
| B6 HET   | 6.90E-11 | NA     | NA       | NA     | NA       |         |          |         |
| C3H HET  | NA       | 0.0003 | NA       | NA     | NS       | NA      |          |         |
| D2-G HET | NA       | NA     | 5.60E-08 | NA     | NS       | NS      | NA       |         |
| 129 HET  | NA       | NA     | NA       | NS     | 1.00E-05 | 0.009   | NS       | NA      |

**9-12 months old P values**

| Group   | B6 WT | C3H WT | D2-G WT | 129 WT | B6 HET | C3H HET | D2-G HET | 129 HET |
|---------|-------|--------|---------|--------|--------|---------|----------|---------|
| B6 WT   | NA    |        |         |        |        |         |          |         |
| C3H WT  | NS    | NA     |         |        |        |         |          |         |
| D2-G WT | NS    | NS     | NA      |        |        |         |          |         |

|          |          |            |            |    |            |            |            |    |
|----------|----------|------------|------------|----|------------|------------|------------|----|
| 129 WT   | NS       | NS         | NS         | NA |            |            |            |    |
| B6 HET   | 1.80E-17 | NA         | NA         | NA | NA         |            |            |    |
| C3H HET  | NA       | 8.8594E-07 | NA         | NA | NS         | NA         |            |    |
| D2-G HET | NA       | NA         | 7.4831E-12 | NA | NS         | NS         | NA         |    |
| 129 HET  | NA       | NA         | NA         | NS | 3.0677E-11 | 2.4517E-05 | 5.6186E-08 | NA |

**C. IOP distribution (Figure S1A,C,E)**

**3-6 months old P values**

| Group    | B6 WT    | D2-G WT  | 129 WT | B6 HET   | D2-G HET | 129 HET |
|----------|----------|----------|--------|----------|----------|---------|
| B6 WT    | NA       |          |        |          |          |         |
| D2-G WT  | NS       | NA       |        |          |          |         |
| 129 WT   | NS       | NS       | NA     |          |          |         |
| B6 HET   | 9.00E-12 | NA       | NA     | NA       |          |         |
| D2-G HET | NA       | 6.60E-04 | NA     | NS       | NA       |         |
| 129 HET  | NA       | NA       | NS     | 3.50E-05 | NS       | NA      |

**6-9 months old P values**

| Group    | B6 WT    | C3H WT   | D2-G WT  | 129 WT | B6 HET   | C3H HET  | D2-G HET | 129 HET |
|----------|----------|----------|----------|--------|----------|----------|----------|---------|
| B6 WT    | NA       |          |          |        |          |          |          |         |
| C3H WT   | NS       | NA       |          |        |          |          |          |         |
| D2-G WT  | NS       | NS       | NA       |        |          |          |          |         |
| 129 WT   | NS       | NS       | NS       | NA     |          |          |          |         |
| B6 HET   | 1.50E-12 | NA       | NA       | NA     | NA       |          |          |         |
| C3H HET  | NA       | 4.00E-04 | NA       | NA     | NS       | NA       |          |         |
| D2-G HET | NA       | NA       | 6.60E-04 | NA     | NS       | NS       | NA       |         |
| 129 HET  | NA       | NA       | NA       | NS     | 2.10E-07 | 1.10E-04 | 0.0012   | NA      |

**9-12 months old P values**

| Group    | B6 WT    | C3H WT   | D2-G WT  | 129 WT | B6 HET   | C3H HET  | D2-G HET | 129 HET |
|----------|----------|----------|----------|--------|----------|----------|----------|---------|
| B6 WT    | NA       |          |          |        |          |          |          |         |
| C3H WT   | NS       | NA       |          |        |          |          |          |         |
| D2-G WT  | NS       | NS       | NA       |        |          |          |          |         |
| 129 WT   | NS       | NS       | NS       | NA     |          |          |          |         |
| B6 HET   | 2.20E-16 | NA       | NA       | NA     | NA       |          |          |         |
| C3H HET  | NA       | 0.000106 | NA       | NA     | NS       | NA       |          |         |
| D2-G HET | NA       | NA       | 7.49E-10 | NA     | NS       | NS       | NA       |         |
| 129 HET  | NA       | NA       | NA       | NS     | 1.80E-14 | 3.46E-05 | 6.65E-10 | NA      |

**D. IOP deviation distribution (Figure S1B,D,F)**

**3-6 months old P values**

| Group    | B6 WT    | D2-G WT  | 129 WT | B6 HET   | D2-G HET | 129 HET |
|----------|----------|----------|--------|----------|----------|---------|
| B6 WT    | NA       |          |        |          |          |         |
| D2-G WT  | NS       | NA       |        |          |          |         |
| 129 WT   | NS       | NS       | NA     |          |          |         |
| B6 HET   | 2.81E-11 | NA       | NA     | NA       |          |         |
| D2-G HET | NA       | 3.57E-04 | NA     | NS       | NA       |         |
| 129 HET  | NA       | NA       | NS     | 1.38E-04 | NS       | NA      |

**6-9 months old P values**

| Group    | B6 WT    | C3H WT   | D2-G WT  | 129 WT | B6 HET   | C3H HET  | D2-G HET | 129 HET |
|----------|----------|----------|----------|--------|----------|----------|----------|---------|
| B6 WT    | NA       |          |          |        |          |          |          |         |
| C3H WT   | NS       | NA       |          |        |          |          |          |         |
| D2-G WT  | NS       | NS       | NA       |        |          |          |          |         |
| 129 WT   | NS       | NS       | NS       | NA     |          |          |          |         |
| B6 HET   | 5.56E-12 | NA       | NA       | NA     | NA       |          |          |         |
| C3H HET  | NA       | 3.97E-04 | NA       | NA     | NS       | NA       |          |         |
| D2-G HET | NA       | NA       | 1.13E-05 | NA     | NS       | NS       | NA       |         |
| 129 HET  | NA       | NA       | NA       | NS     | 8.25E-05 | 5.08E-05 | NS       | NA      |

**9-12 months old P values**

| Group    | B6 WT    | C3H WT   | D2-G WT  | 129 WT | B6 HET   | C3H HET  | D2-G HET | 129 HET |
|----------|----------|----------|----------|--------|----------|----------|----------|---------|
| B6 WT    | NA       |          |          |        |          |          |          |         |
| C3H WT   | NS       | NA       |          |        |          |          |          |         |
| D2-G WT  | NS       | NS       | NA       |        |          |          |          |         |
| 129 WT   | NS       | NS       | NS       | NA     |          |          |          |         |
| B6 HET   | 1.49E-15 | NA       | NA       | NA     | NA       |          |          |         |
| C3H HET  | NA       | 9.41E-05 | NA       | NA     | NS       | NA       |          |         |
| D2-G HET | NA       | NA       | 5.71E-10 | NA     | NS       | NS       | NA       |         |
| 129 HET  | NA       | NA       | NA       | NS     | 1.06E-09 | 9.47E-05 | 6.20E-06 | NA      |

NA, Not applicable (to test); NS, not significant



**Table S3: Glaucoma GWAS genes on mouse Chromosome 18**

| <b>Associated Gene</b> | <b>Mouse Chr. 18 Position (Mb)</b> | <b>Reference Paper</b> | <b>Phenotype Association</b>    |
|------------------------|------------------------------------|------------------------|---------------------------------|
| <i>Arhgap12</i>        | 60.2-61.3                          | (Craig et al., 2020)   | Multitrait analysis of glaucoma |
| <i>Cdc25c</i>          | 34.7-34.8                          | (Craig et al., 2020)   | Multitrait analysis of glaucoma |
| <i>Jakmip2</i>         | 43.5-43.7                          | (Craig et al., 2020)   | Multitrait analysis of glaucoma |
| <i>Mpp7</i>            | 73.5-76.2                          | (Vishal et al., 2016)  | Open angle glaucoma             |
| <i>Tcf4*</i>           | 69.3-69.7                          | (Choquet et al., 2017) | IOP elevation                   |

\*Lead SNP associated with both the *TCF4* and *LINC01415* loci
